# Supplementary material for: A high-efficiency oxygen evolution electrode material of a carbon material containing a NiCo bimetal
Source: Royal Society of Chemistry journal article supplement (doi:10.1039/d1ra01997j), 2021-01-01
Supplement: d1ra01997j1.pdf [file d1ra01997j1.pdf]

## Supporting Information

### **High-efficiency oxygen evolution electrode material of carbon material containing NiCo bimetal**

Hongxin Guan<sup>a</sup>, Na Wang<sup>b</sup>, Xuanxuan Feng<sup>b</sup>, Shaokang Bian<sup>b</sup>, Wei Li<sup>\*a</sup>,

Yan Chen<sup>\*b</sup>

<sup>a</sup>State Key Laboratory of Metastable Materials Science and Technology, Yanshan University, 066004 Qinhuangdao, PR China. E-mail: liwei@ysu.edu.cn

<sup>b</sup>Hebei Key Laboratory of Applied Chemistry, College of Environmental and Chemical Engineering, Yanshan University, Qinhuangdao, Hebei, 066004, China. E-mail: chenyan@ysu.edu.cn

\* Corresponding author.

## **I. Materials**

### **1.1 Chemicals:**

Nickel foam (Ni purity 99.9%, porosity 95% -98%, pore size 0.2-0.5 mm, PPI 110), Changsha ChangdeLiyuan Technology Co., Ltd., hydrochloric acid (HCl, analytically pure), HebeiYongfei Chemical Factory, acetone ( $\text{CH}_3\text{COCH}_3$ , analytically pure), HebeiYongfei Chemical Factory, Potassium hydroxide (KOH, analytically pure), N, N-dimethylformamide (DMF, analytically pure), absolute ethanol ( $\text{C}_2\text{H}_5\text{OH}$ , analytically pure), Tianjin Guangfu Technology Development Co., Ltd., nickel nitrate hexahydrate ( $\text{Ni}(\text{NO}_3)_2 \cdot 6\text{H}_2\text{O}$  analytical purity), cobalt nitrate hexahydrate ( $\text{Co}(\text{NO}_3)_2 \cdot 6\text{H}_2\text{O}$ , analytical purity), para-dicarboxylic acid ( $\text{C}_8\text{H}_6\text{O}_4$  analytically pure), Aladdin. The above drugs have not been further purified.

### **1.2 Characterization:**

X-ray diffractometer (XRD, Shimadzu XRD-6000, Japan) detected the phase purity and crystal structure of sample, surface morphology of the catalyst tested by field emission scanning electron microscope (FE-SEM, Hitachi S-4800, Japan). Brunner-Emmet-Teller (BET, ASAP 2020 HD88, USA) was used to test and analyze the specific surface area and pore size of the sample. And used simultaneous thermal analyzer (DSC/TG, STA 449C, Germany) to test pyrolysis temperature of analyzed material.

## II. Supplementary Figures and Tables

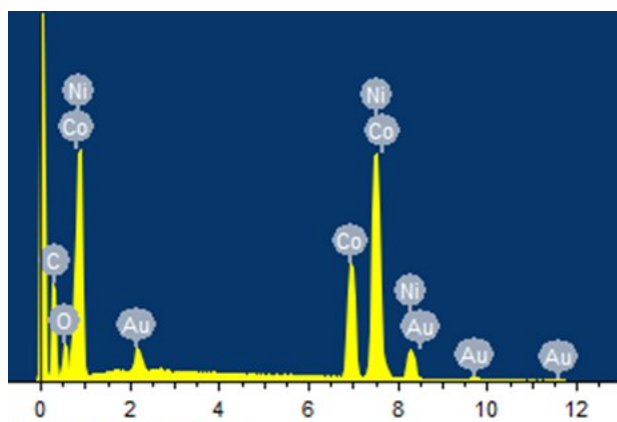

Figure S1. EDS Element spectrum for NiCo-C/NF

Table S1. EDS atomic percentage for NiCo-C/NF

| element               | C    | O     | Co    | Ni    | Au   |
|-----------------------|------|-------|-------|-------|------|
| Atomic percentage (%) | 8.74 | 13.82 | 22.89 | 53.30 | 1.26 |

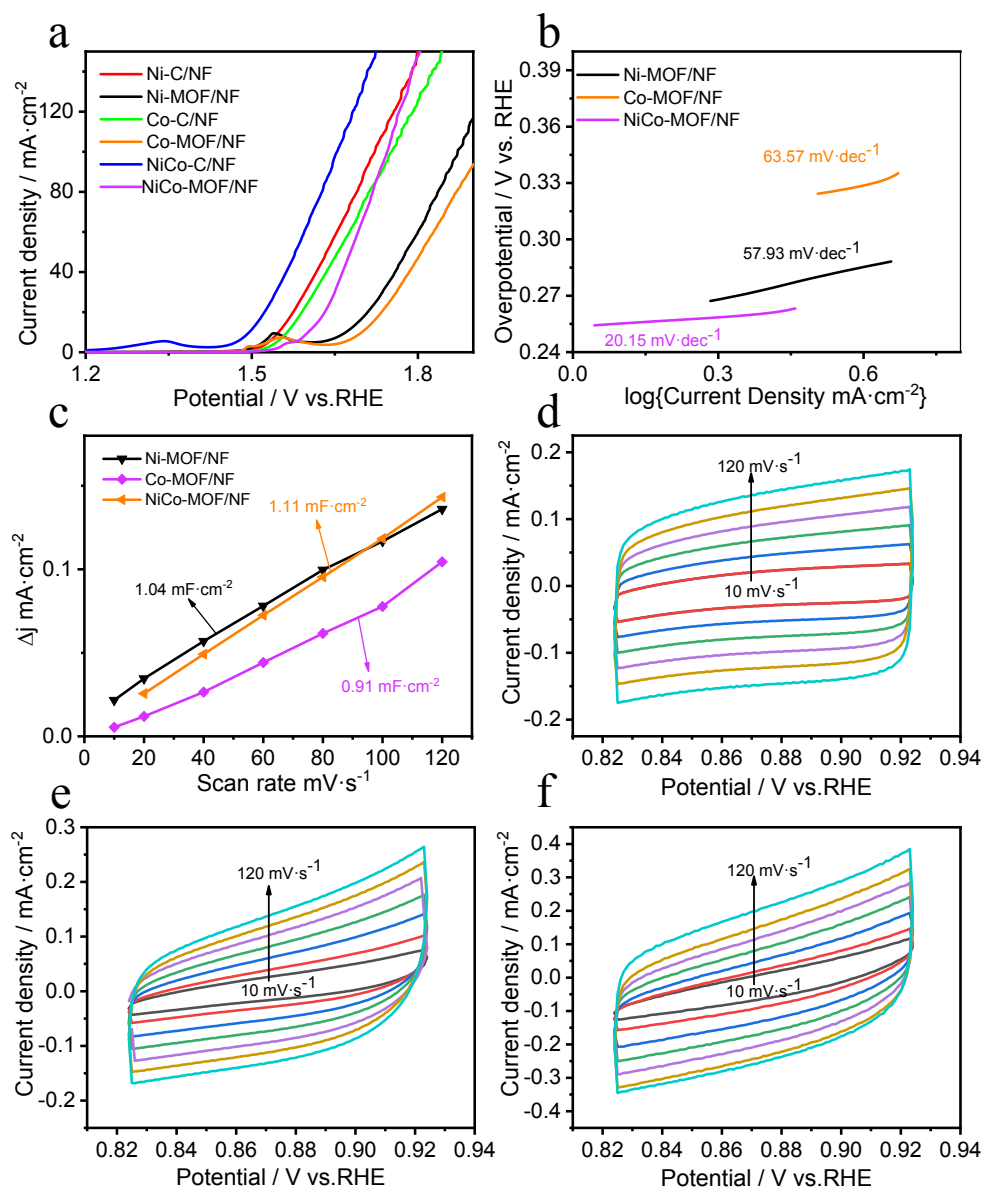

**Figure S2.** (a) Ni-MOF/NF, Co-MOF/NF, NiCo-MOF/NF, Ni-C/NF, Co-C/NF and NiCo-C/NF LSV curves; (b) Tafel plots; (c) Double layer capacitance ( $C_{dl}$ ); (d-f) Ni-MOFs/NF, Co-MOF/NF and NiCo-MOF/NF CV curves were conducted in the voltage range 0.82-0.92 V vs. RHE with a scan rate of 10 - 120 mV·s<sup>-1</sup>

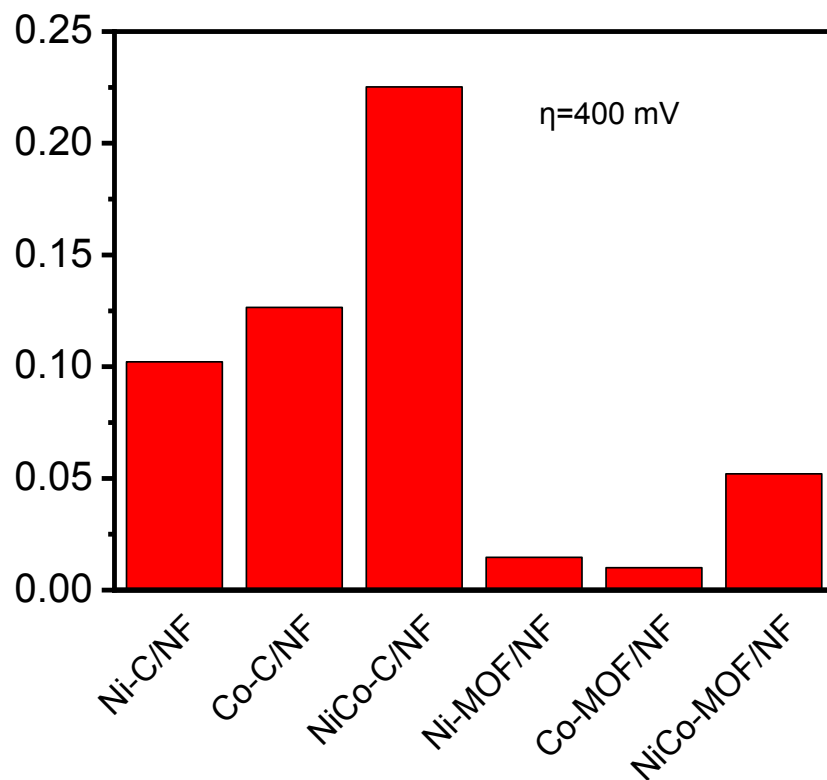

**Figure S3.** TOF of Ni-C/NF; Co-C/NF; NiCo-C/NF; Ni-MOF/NF; Co-MOF/NF and NiCo-MOF/NF current density at 400 mV overpotential.

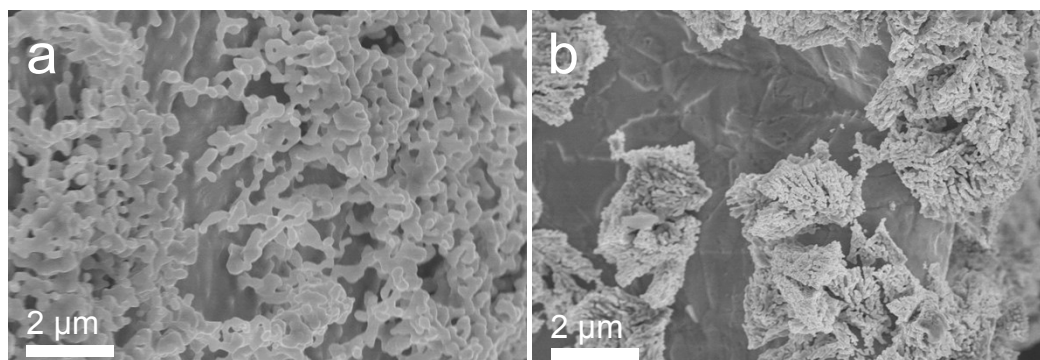

**Figure S4.** SEM after electrochemical test for :(a) Ni-C/NF; (b) Co-C/NF

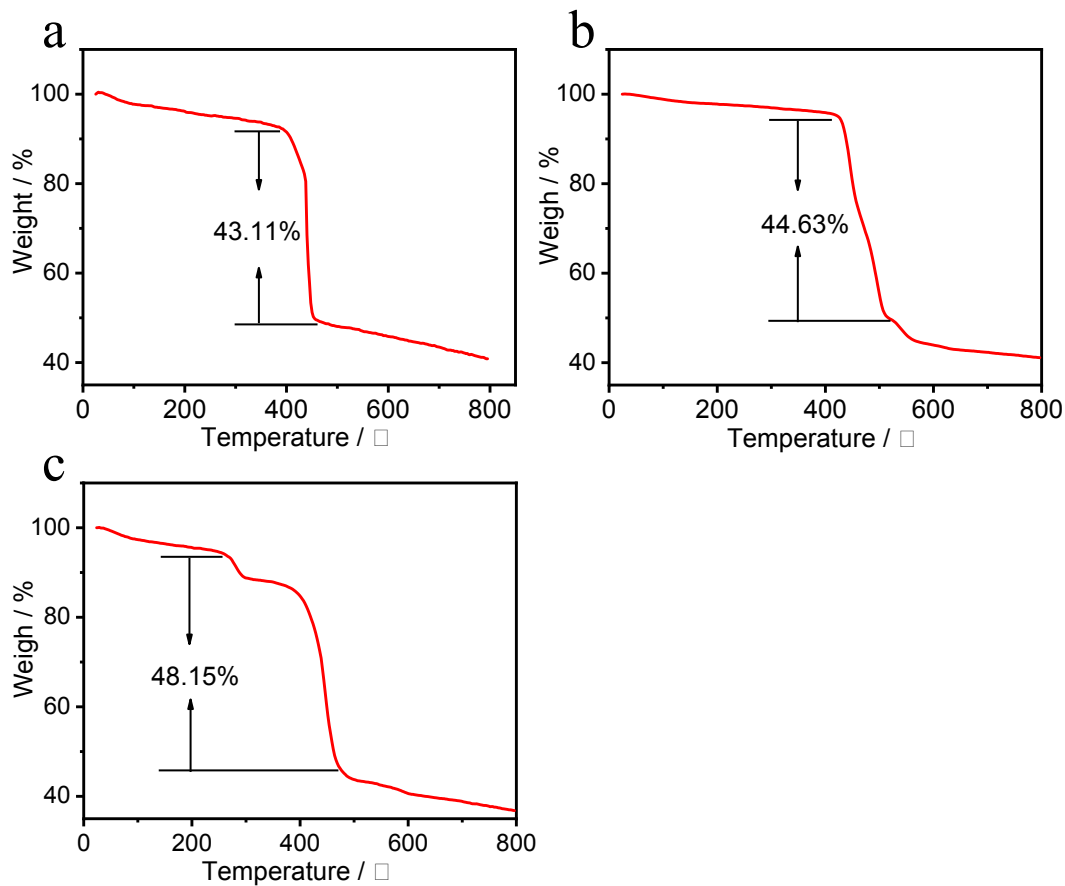

**Figure S5.** TG for Ni-MOF/NF; Co-MOF/NF; NiCo-MOF/NF.

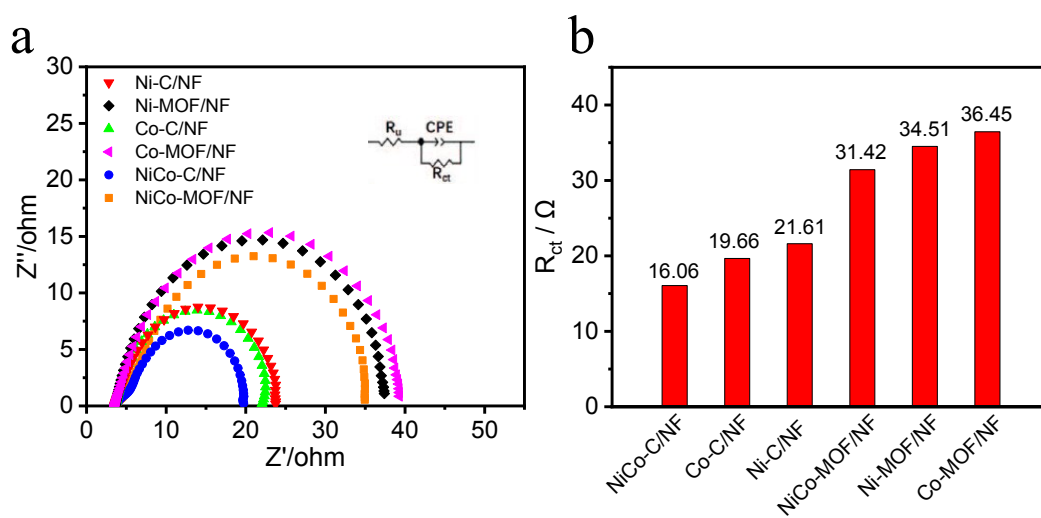

**Figure S6.** (a) Corresponding electrochemical impedance spectroscopy (EIS) Nyquist plots of different catalysts. (b)  $R_{ct}$  data comparison chart of catalyst.

**Table S2.** The loading content of the catalyst (1 cm<sup>2</sup>)

| Material  | Before the cycle | After the cycle | Loading weight |
|-----------|------------------|-----------------|----------------|
| NF        | 49.3 mg          | /               | /              |
| Ni-C/NF   | 61.6 mg          | 57.5 mg         | 12.3 mg        |
| Co-C/NF   | 63.5 mg          | 58.6 mg         | 14.2 mg        |
| NiCo-C/NF | 62.2 mg          | 60.6 mg         | 12.9 mg        |

**Table S3.** Comparison for OER activity for NiCo-C/NF with other electrocatalysts

| Material                | Electolyte | Overpotenti(mV)           | Ref       |
|-------------------------|------------|---------------------------|-----------|
| NiCo-MOF/NF             | 1.0 M KOH  | 260@10mA cm <sup>-2</sup> | This work |
| IrO <sub>2</sub> /NF    | 1.0 M KOH  | 320@10mA cm <sup>-2</sup> | 1         |
| RuO <sub>2</sub>        | 1.0 M KOH  | 299@10mA cm <sup>-2</sup> | 2         |
| Co/W-C@NCNSs            | 1.0 M KOH  | 323@10mA cm <sup>-2</sup> | 3         |
| Fe/Co-MOF               | 1.0 M KOH  | 410@10mA cm <sup>-2</sup> | 4         |
| Co <sub>2</sub> Fe-MOFs | 1.0 M KOH  | 280@10mA cm <sup>-2</sup> | 5         |
| Co <sub>3</sub> Fe-MOF  | 1.0 M KOH  | 280@10mA cm <sup>-2</sup> | 6         |
| CuO@MIL-53(Cu)          | 1.0 M KOH  | 336@10mA cm <sup>-2</sup> | 7         |

|                                          |           |                             |    |
|------------------------------------------|-----------|-----------------------------|----|
| AB&Ni-MOF(1:1)/GC                        | 1.0 M KOH | 379@10mA cm <sup>-2</sup>   | 8  |
| CoFe@SNCN                                | 1.0 M KOH | 306.4@10mA cm <sup>-2</sup> | 9  |
| Co-Fe-P-Se/NC                            | 1.0 M KOH | 270@10mA cm <sup>-2</sup>   | 10 |
| SNNU-5-FeCoNi                            | 1.0 M KOH | 317@10mA cm <sup>-2</sup>   | 11 |
| CN-Fe <sub>2</sub> Co-Fe <sub>2</sub> Ni | 1.0 M KOH | 271@10mA cm <sup>-2</sup>   | 12 |
| Co-MOF <sub>72h</sub>                    | 1.0 M KOH | 387@10mA cm <sup>-2</sup>   | 13 |

---

## References

- [1] D. S. Raja, H. W. Lin, S. Y. Lu, *Nano Energy*, 2019, 57, 1-13.
- [2] Y. Shen, S. G. Guo, F. Du, X. B. Yuan, Y. T. Zhang, J. Q. Hu, Q. Shen, W. J. Luo, A. Alsaedi, T. Hayat, G. H. Wen, G. L. Li, Y. Zhou, Z. Q. Zou, *Nanoscale*, 2019, 11, 11765-11773.
- [3] T. Zhao, J. K. Gao, J. Wu, P. P. He, Y. W. Li, J. M. Yao, *Energy Technol.*, 2019, 4, 1800969.
- [4] B. Iqbal, M. Saleem, S. N. Arshad, J. Rashid, N. Hussain, M. Zaheer, *Chem. Eur. J.*, 2019, 25, 10490-10498.
- [5] S.L. Xie, F. Li, S. X. Xu, J. Y. Li, W. Zeng, *Chinese J. Catal.*, 2019, 40, 1205-1211.
- [6] W. X. Li, W. Fang, C. Wu, K. N. Dinh, H. Ren, L. Zhao, C. T. Liu, Q. Y. Yan, *J. Mater. Chem. A*, 2020, 8, 3658-3666.



- [7] M. Amiri, Z. Tofighi, A. Khodayari, A. Bezaatpour, S. Sohrabnezhad, V. Mishyn, R. Boukherroub, S. Szunerits, *Appl. Organomet. Chem.*, 2020, 10, 1-10.
- [8] X. Wang, B. Li, Y. P. Wu, A. Tsamis, H. G. Yu, S. Liu, J. Zhao, Y. S. Li, D. S. Li, *Inorg. Chem.*, 2020, 59, 4764-4771.
- [9] H. X. Chen, Y. W. Li, H. J. Liu, Q. H. Ji , L. J. Zou , J.K. Gao, *J. Solid. State. Chem.*, 2020, 288, 121421.
- [10] H. B. Wu, J. Wang, J. Yan, Z. X. Wu, W. Jin, *Nanoscale*, 2019, 11, 20144-20150.
- [11] Y. Y. Xue, J. W. Zhang, Y. P. Li, H. P. Li, Y. Wang, S. N. Li, Y. C. Jiang, M. C. Hu, Q. G. Zhai, *ACS Appl. Mater. Inter.*, 2020, 4, 4432-4442.
- [12] H. Dong, X. Zhang, X. C. Yan, Y. X. Wang, X. j. Sun, G. L. Zhang, Y. J. Feng, F. M. Zhang, *ACS. Appl. Mater. Inter.*, 2019 11, 45080-45086.
- [13] Z. K. Wang, J. Q. Chen, R. Bi, W. Dou, K. B. Wang, F. F. Mao , H. Wu, S. S. Wang, *J. Solid. State. Chem.*, 2020, 284, 121128.
